# Supplementary material for: Soil Greenhouse Gas Emissions in Different Pastures Implemented as a Management Strategy for Climate Change
Source: MDPI journal article supplement (doi:10.3390/agronomy12051097), 2022-04-30
Supplement: s1 [file s1]

**Table S1.** Dates and rates of nutrients application to the different treatments through the experimental period.

|                 |                                                   | Seeding |     |     |      | F1 |   |   |      | F2 |      |   |      | F3  |    |   |      | F4 |    |    |      |
|-----------------|---------------------------------------------------|---------|-----|-----|------|----|---|---|------|----|------|---|------|-----|----|---|------|----|----|----|------|
|                 |                                                   | C       | B   | L   | Br/L | C  | B | L | Br/L | C  | B    | L | Br/L | C   | B  | L | Br/L | C  | B  | L  | Br/L |
| Nitrogen        | kg N ha <sup>-1</sup>                             | 30      | 30  | 30  | 30   | 69 | - | - | -    | 40 | 68,5 | - | -    | 100 | 40 | - | -    | -  | -  | -  | -    |
| Phosphorus      | kg P <sub>2</sub> O <sub>5</sub> ha <sup>-1</sup> | 280     | 280 | 280 | 280  | -  | - | - | -    | -  | -    | - | -    | -   | -  | - | -    | 55 | 55 | 55 | 55   |
| Potassium       | kg k <sub>2</sub> O ha <sup>-1</sup>              | 180     | 180 | 180 | 180  | -  | - | - | -    | -  | -    | - | -    | -   | -  | - | -    | 93 | 93 | 93 | 93   |
| Sulfur          | kg S ha <sup>-1</sup>                             | 40      | 40  | 40  | 40   | -  | - | - | -    | -  | -    | - | -    | -   | -  | - | -    | -  | -  | -  | -    |
| Magnesium oxide | kg MgO ha <sup>-1</sup>                           | 30      | 30  | 30  | 30   | -  | - | - | -    | -  | -    | - | -    | -   | -  | - | -    | -  | -  | -  | -    |
| Calcium borate  | kg B <sub>2</sub> O <sub>3</sub> ha <sup>-1</sup> | 5       | 5   | 5   | 5    | -  | - | - | -    | -  | -    | - | -    | -   | -  | - | -    | -  | -  | -  | -    |

C = Control; B = *Bromus valdivianus*, L = *Lotus corniculatus*, Br/L = *Bromus valdivianus* + *Lotus corniculatus*.

F1 to F4 = Fertilization 1 to fertilization 4.

**Table S2.** Example of the variation in the N-N<sub>2</sub>O daily flux ( $\mu\text{g N}_2\text{O-N m}^{-2} \text{ hr}^{-1}$ ) in threes chambers at three different dates <sup>1</sup>.

|                                                                          | 24-03-2012 |           |            | 26-03-2012 |            |            | 28-03-2012 |            |            |
|--------------------------------------------------------------------------|------------|-----------|------------|------------|------------|------------|------------|------------|------------|
| Flux emission ( $\mu\text{g N}_2\text{O-N m}^{-2} \text{ hr}^{-1}$ ) at: | Ch 1       | Ch2       | Ch3        | Ch 1       | Ch2        | Ch3        | Ch 1       | Ch2        | Ch3        |
| 2:28:54 h                                                                | 3,752      | 5,045     | 2,299      | 3,060      | 1,950      | 0,119      | 5,812      | 6,827      | 2,227      |
| 5:28:48 h                                                                | 6,016      | 4,934     | 4,311      | 1,076      | 0,992      | 3,465      | 0,368      | 3,668      | 1,494      |
| 8:28:43 h                                                                | 2,549      | 6,020     | 4,160      | 1,092      | 2,263      | 1,148      | 5,627      | 4,462      | 1,676      |
| 11:28:37 h                                                               | 6,169      | 7,146     | 5,555      | 2,999      | 4,712      | 3,797      | 3,177      | 5,461      | 4,731      |
| 14:28:32 h                                                               | 8,327      | 8,091     | 10,283     | 3,142      | 5,676      | 7,114      | 5,123      | 1,176      | 7,815      |
| 17:28:26 h                                                               | 7,469      | 10,379    | 6,587      | 5,529      | 4,485      | 5,205      | 0,985      | 2,547      | 9,928      |
| 20:28:21 h                                                               | 2,954      | 4,380     | 3,915      | 5,455      | 6,115      | 4,127      | 2,846      | 1,654      | 3,990      |
| 23:28:15 h                                                               | 8,429      | 7,624     | 4,112      | 5,041      | 6,847      | 1,176      | 6,114      | 5,022      | 0,593      |
| Daily average                                                            | 5.71±0.835 | 6.7±0.710 | 5.15±0.856 | 3.42±0.634 | 4.13±0.759 | 3.27±0.828 | 3.76±0.798 | 3.85±0.693 | 4.06±1.170 |

<sup>1</sup> Hube, S.; Alfaro, M.; Ramirez, L. 2014. *Validación y evaluación de dos sistemas de muestreo y análisis para cálculo de flujo de gases de efecto invernadero*. Osorno: Serie Actas - Instituto de Investigaciones Agropecuarias. no. 54. <https://biblioteca.inia.cl/handle/20.500.14001/8693> (accessed on 30 March 2022)

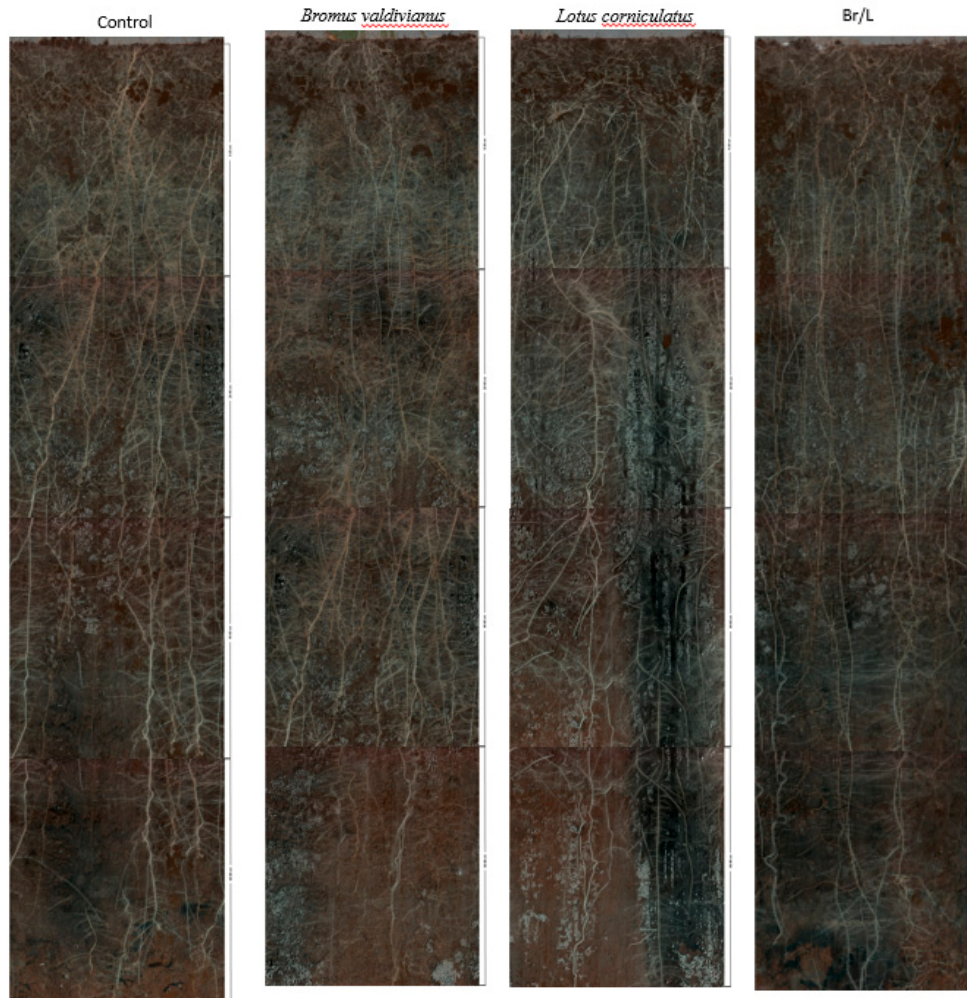

**Figure S1.** Examples of root development for all treatments (0-0.8 m depth). C = Control; B = *Bromus valdivianus*, L = *Lotus corniculatus*, Br/L = *Bromus valdivianus* + *Lotus corniculatus*. Root development was measured using minirizotrons in all plots (2 acrylic tubes per plot, 0- 0.8 m depth) in one occasion during each season using a scanner (CI-600, CID Bio-Science). All images were analysed using the software RootSnap (CID, Bio-Science).
